# Supplementary material for: Analysis of how dry-hot wind hazard has changed for winter wheat in the Huang-huai-hai plain
Source: Copernicus journal article supplement (doi:10.5194/nhess-2015-330), 2016-01-27
Supplement: Supplementary file [file nhess-2015-330-AC2-supplement.zip]

## Anonymous Referee #2

1. In the paper, the insignificant results are not reliable and helpful, such as in the introduction: From 1963 to 2012, a climatic mutation point of daily maximum temperature was found near 1972, but insignificantly ( $p > 0.05$ ).

**R:** Thanks for your comment. This sentence “From 1963 to 2012, a climatic mutation point of daily maximum temperature was found near 1972....” was in the Section 3.1. Because we did not explain the Figure 1 clearly, according to your comments, we have re-written the section 3.1 and explained Figure 1 again. The revised text can be found on Line 155-177.

2. The second paragraph in the introduction should be modified. The first two sentences in this paragraph should be in the form of scientific paper, not like news. And the content in this paragraph should be reorganized, maybe divided into two parts.

**R:** Thank you for your constructive suggestions. In the revised manuscript, the second paragraph in the introduction was modified. The first two sentences in this paragraph were changed to “In recent years, some papers have been published in “*Nature*”, that emphasized the effects of climate change and meteorological disasters on winter wheat, and found that climatic warming and extreme drought resulted in early maturation, yield loss, and decline in dry matter accumulation of wheat (Piao et al., 2010; Lobell et al., 2012; Pongratz et al., 2012; Basso et al., 2014; Asseng et al., 2015).” And we divided this paragraph into two parts. The revised contents in this paragraph were in Line 52-55.

3. Besides, the English should be improved for better understanding.

**R:** Thanks for your comment. We have invited a native English speaker and a professional editing company to edit our manuscript.
